# Supplementary material
Source: MDPI journal article supplement (https://www.mdpi.com/2036-7503/14/1/19)

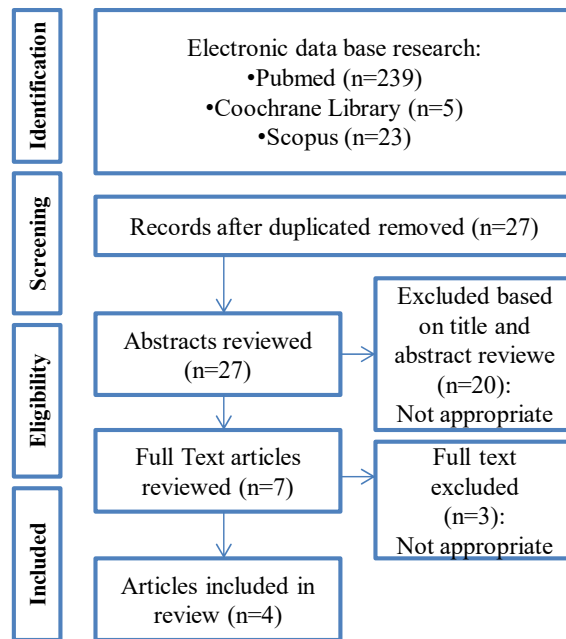

**Figure S1.** Flowchart of literature search results (Supplementary file on line only).

Supplement: s1 [file s1]
